# Supplementary material for: EGFR and KRAS Mutations Predict the Incidence and Outcome of Brain Metastases in Non-Small Cell Lung Cancer
Source: PubMed Central journal article supplement (PMC5187932; doi:10.3390/ijms17122132), 2016-12-18
Supplement: ijms-17-02132-s001.pdf [file ijms-17-02132-s001.pdf]

## Supplementary Materials: *EGFR* and *KRAS* Mutations Predict the Incidence and Outcome of Brain Metastases in Non-small Cell Lung Cancer

Pascale Tomasini, Cindy Serdjebi, Nataliya Khobta, Philippe Metellus, L'Houcine Ouafik, Isabelle Nanni, Laurent Greillier, Anderson Loundou, Frederic Fina, Celine Mascaux and Fabrice Barlesi

**Table S1.** *EGFR* and *KRAS* mutations identified. *EGFR* mutations were classified according to their location on DNA sequence (exon), whereas *KRAS* mutations were stratified according to their location on the mRNA (codon).

| <i>EGFR</i> Mutations    |                        |                          | <i>KRAS</i> Mutations |                          |                          |
|--------------------------|------------------------|--------------------------|-----------------------|--------------------------|--------------------------|
| Base change              | Amino acid change      | Patients<br><i>n</i> (%) | Base<br>change        | Amino-<br>acid<br>change | Patients <i>n</i><br>(%) |
| Subjects                 |                        | 16 (11.27)               | Subjects              |                          | 47 (33.10)               |
| Exon18                   |                        |                          | Codon 12              |                          |                          |
| c.2104G>C                | Ala702Pro              | 1 (6.25)                 | c.34G>T               | Gly12Cys                 | 27 (57.45)               |
| Exon 19                  |                        |                          | c.34G>A               | Gly12Ser                 | 3 (6.38)                 |
| c.2235_2249del           | Glu746_Ala750del       | 8 (50.00)                | c.35G>C               | Gly12Ala                 | 2 (4.26)                 |
| c.2235_2255<br>delinsAAT | Glu746_Ser752delinsIle | 1 (6.25)                 | c.35G>A               | Gly12Asp                 | 7 (14.89)                |
| c.2237_2251del           | Glu746_Thr751delInsAla | 1 (6.25)                 | c.35G>T               | Gly12Val                 | 5 (10.64)                |
| c.2237_2255delinsT       | Glu746_Ser752delinsVal | 1 (6.25)                 | Codon 13              |                          |                          |
| Exon 21                  |                        |                          | c.37G>T               | Gly13Cys                 | 1 (2.13)                 |
| c.2573T>G                | Leu858Arg              | 3 (18.75)                | c.38G>A               | Gly13Asp                 | 2 (4.26)                 |
| c.2582T>A                | Leu861Gln              | 1 (6.25)                 |                       |                          |                          |
